# Supplementary material for: MCM2-7 loading-dependent ORC release ensures genome-wide origin licensing
Source: Springer Nature journal article supplement (doi:10.1038/s41467-024-51538-9), 2024-08-24
Supplement: MOESM3 [file 41467_2024_51538_MOESM3_ESM.pdf › 41467_2024_51538_MOESM3_ESM.pdf]

## **Description of Additional Supplementary Files**

File Name: Supplementary Data 1

Description: Genomic location of origin elements, non-origin binding sites and ORC/MCM2-7 binding sites.
