# Supplementary material for: MCM2-7 loading-dependent ORC release ensures genome-wide origin licensing
Source: Nat Commun. 2024 Aug 24;15:7306. doi: 10.1038/s41467-024-51538-9 (PMC11344781; doi:10.1038/s41467-024-51538-9)
Supplement: Supplementary file 4 — Supplementary Data 1 [file 41467_2024_51538_MOESM4_ESM.xlsx]

## Sheet: overview B2 elements
single	double	triple	quadruple	penta	incorrect	nonidentified		B2 elements
ARS105	ARS111	ARS207	ARS409	ARS1006	ARS110	ARS104
ARS107	ARS307	ARS418	ARS1605		ARS201	ARS106
ARS201.5	ARS421	ARS1513	ARS419		ARS202	ARS108
ARS203	ARS511	ARS1007	ARS507		ARS206	ARS109
ARS213	ARS818	ARS317	ARS1528		ARS208	ARS211
ARS214	ARS1014	ARS720	ARS414		ARS218	ARS215
ARS216	ARS1109	ARS1412	ARS429		ARS225	ARS228
ARS220	ARS1217	ARS1205	ARS704		ARS302	ARS314
ARS221	ARS1413	ARS710	ARS805		ARS309	ARS404
ARS224	ARS1517	ARS912	ARS1232		ARS313	ARS417
ARS227	ARS1628	ARS920			ARS319	ARS420
ARS229	ARS727	ARS1023			ARS400	ARS423
ARS301	ARS1114	ARS1519			ARS434	ARS432
ARS306	ARS916	ARS734			ARS440	ARS441
ARS310	ARS1332	ARS1619			ARS446	ARS447
ARS315	ARS435				ARS523	ARS905
ARS316	ARS1511				ARS600.1	ARS913.5
ARS318	ARS209				ARS609	ARS919
ARS403	ARS305				ARS707	ARS504.2
ARS405	ARS1422				ARS728	ARS510
ARS406	ARS520				ARS131a	ARS513.7
ARS410	ARS1005				ARS131n	ARS600.4
ARS412	ARS1113				ARS804	ARS601
ARS416	ARS1315				ARS824	ARS602
ARS417.5	ARS1330				proARS902	ARS606
ARS425	ARS1514				ARS908	ARS702
ARS428	ARS1621				ARS909	ARS716
ARS430	ARS516				ARS911	ARS717
ARS431	ARS1626				ARS913	ARS721
ARS432.5	ARS714				ARS1002	ARS726
ARS442	ARS731.5				ARS1019	ARS731
ARS907	ARS415				ARS1025	ARS820
ARS914	ARS437				ARS1114.5	ARS1004
ARS922	ARS1112				ARS1211.5	ARS1008
ARS508	ARS1424				ARS1219	ARS1009
ARS512	ARS1529				ARS1223	ARS1010
ARS514	ARS413				ARS1235	ARS1015
ARS517	ARS222				proARS1301	ARS1017
ARS518	ARS1509				ARS1304	ARS1020
ARS522	proARS1506				ARS1516	ARS1024
ARS603	ARS1116				ARS1520	ARS1106
ARS603.5					ARS1624	ARS1106.7
ARS605					ARS1626.5	ARS1107
ARS607						ARS1107.5
ARS700.5						ARS1117
ARS712						ARS1118
ARS718						ARS1120
ARS719						ARS1123
ARS722						ARS1209
ARS729						ARS1218
ARS733						ARS1222
ARS735.5						ARS1307.5
ARS802						ARS1308
ARS809						ARS1309
ARS813						ARS1319
ARS823.5						ARS1322
ARS1003						ARS1323
ARS1007.5						ARS1325
ARS1011						ARS1328
ARS1012						ARS1329
ARS1018						ARS1410
ARS1021						ARS1411
ARS1022						ARS1414
ARS1103						ARS1419
ARS1104.5						ARS1420
ARS1206						ARS1428.5
ARS1211						ARS1510
ARS1212						ARS1512
ARS1213						ARS1601
ARS1215						ARS1604
ARS1220						ARS1607
ARS1226						ARS1620.5
ARS1227						ARS1622.7
ARS1227.5						ARS1625
ARS1229						ARS1627
ARS1233						ARS1630
ARS1234						ARS1631
ARS1303						proARS1632
ARS1307						ARS815
ARS1310						ARS822
ARS1312						ARS422
ARS1320						ARS102
ARS1324						ARS320
ARS1326						ARS608
ARS1327
ARS1331.7
ARS1405
ARS1406
ARS1429
ARS1407
ARS1415
ARS1417
ARS1421
ARS1426
ARS1427
ARS1428
ARS1506.5
ARS1507
ARS1508
ARS1510.5
ARS1513.5
ARS1521
ARS1523
ARS1524
ARS1526
ARS1529.5
proARS1608
ARS1614
ARS1617
ARS1618
ARS1622
ARS1622.5
ARS1623
ARS433

## Sheet: single B2
chrI	124442	124473	-
chrII	389200	389231	-
chrII	407939	407969	-
chrII	741678	741709	-
chrII	773940	773971	-
chrIII	166662	166693	-
chrIII	272899	272930	-
chrIV	86044	86075	-
chrIV	123727	123758	-
chrIV	462532	462563	-
chrIV	505428	505459	-
chrIV	1166132	1166163	-
chrV	406820	406851	-
chrV	439013	439044	-
chrV	549559	549589	-
chrVI	135915	135946	-
chrVII	484966	484997	-
chrVIII	7614	7645	-
chrVIII	168573	168604	-
chrIX	73908	73939	-
chrIX	247824	247855	-
chrIX	411910	411941	-
chrX	113699	113730	-
chrXI	55761	55792	-
chrXII	289356	289387	-
chrXII	373196	373227	-
chrXII	412765	412796	-
chrXII	794119	794150	-
chrXII	888620	888651	-
chrXIII	758342	758372	-
chrXIV	28708	28738	-
chrXIV	412389	412420	-
chrXIV	546080	546111	-
chrXIV	635718	635749	-
chrXIV	691606	691637	-
chrXV	874304	874335	-
chrIV	1016806	1016837	-
chrVII	17814	17845	-
chrVII	421164	421195	-
chrVII	977816	977847	-
chrVIII	535548	535579	-
chrXIII	535665	535696	-
chrXV	436765	436796	-
chrXII	1024074	1024105	-
chrXIII	688905	688936	-
chrII	93630	93661	+
chrII	622835	622865	+
chrII	632118	632149	+
chrIII	11305	11336	+
chrIII	224928	224959	+
chrIV	15649	15680	+
chrIV	253916	253947	+
chrIV	316914	316945	+
chrIV	913975	914006	+
chrIV	1057985	1058016	+
chrIV	1462158	1462189	+
chrV	94111	94142	+
chrV	212467	212498	+
chrVI	68912	68943	+
chrVII	241249	241280	+
chrVII	778064	778094	+
chrVII	1063566	1063597	+
chrVIII	245800	245830	+
chrX	337374	337405	+
chrX	374998	375029	+
chrX	540646	540677	+
chrX	684074	684105	+
chrX	711987	712018	+
chrXI	98498	98529	+
chrXII	91483	91514	+
chrXII	231326	231357	+
chrXII	659971	660002	+
chrXIII	137407	137438	+
chrXIII	286914	286945	+
chrXIII	634563	634594	+
chrXIII	878821	878852	+
chrXIV	61815	61846	+
chrXIV	713970	714000	+
chrXV	72740	72771	+
chrXV	227611	227642	+
chrXV	729836	729867	+
chrXV	783414	783445	+
chrXV	1053794	1053825	+
chrXVI	162528	162558	+
chrXVI	289566	289597	+
chrXVI	384662	384693	+
chrXVI	563924	563955	+
chrXVI	565244	565275	+
chrXVI	633971	634001	+
chrII	29038	29069	+
chrVI	199451	199482	+
chrVII	574739	574770	+
chrX	16510	16541	+
chrXII	822103	822134	+
chrXII	928338	928369	+
chrXII	1013838	1013869	+
chrXIII	31791	31822	+
chrXIV	322042	322073	+
chrXV	766769	766800	+
chrIII	74578	74609	+
chrIV	806149	806180	+
chrV	287602	287633	+
chrX	161815	161846	+
chrXIII	371095	371126	+
chrIV	1240950	1240981	+
chrXV	35823	35854	+
chrI	42021	42052	-
chrII	486770	486801	-
chrII	802252	802283	+
chrIII	294802	294833	-
chrVI	118721	118753	+
chrXIV	764333	764364	+
chrXIV	89675	89706	-
chrXVI	331871	331902	+

## Sheet: double B2
chrI	214939	214970	-
chrI	214946	214977	-
chrIII	108872	108903	-
chrIII	108896	108927	-
chrIV	639915	639946	-
chrIV	639941	639972	-
chrV	173697	173728	-
chrV	173727	173758	-
chrVIII	392158	392189	-
chrVIII	392184	392215	-
chrX	417291	417322	-
chrX	417312	417343	-
chrXI	329728	329759	-
chrXI	329789	329820	-
chrXII	512960	512991	-
chrXII	512979	513010	-
chrXIV	250374	250405	-
chrXIV	250397	250428	-
chrXV	600842	600873	-
chrXV	600859	600890	-
chrXVI	842765	842796	-
chrXVI	842792	842823	-
chrVII	659898	659929	-
chrVII	659909	659940	-
chrXI	448067	448098	-
chrXI	448087	448118	-
chrIX	310669	310700	-
chrIX	310683	310714	-
chrXIII	897886	897917	-
chrXIII	897875	897906	-
chrIV	1302687	1302718	-
chrIV	1302709	1302740	-
chrXV	277628	277659	-
chrXV	277643	277674	-
chrII	255004	255035	-
chrII	254984	255015	-
chrIII	39508	39539	-
chrIII	39473	39504	-
chrXIV	561283	561314	-
chrXIV	561272	561303	-
chrV	498923	498954	+
chrV	498977	499008	+
chrX	67682	67713	+
chrX	67699	67730	+
chrXI	417286	417317	+
chrXI	417298	417329	+
chrXIII	433049	433080	+
chrXIII	433114	433145	+
chrXIII	815427	815458	+
chrXIII	815468	815499	+
chrXV	490004	490035	+
chrXV	490015	490046	+
chrXVI	511758	511789	+
chrXVI	511786	511817	+
chrV	353608	353639	+
chrV	353643	353674	+
chrXVI	749197	749228	+
chrXVI	749208	749239	+
chrVII	286044	286075	+
chrVII	286064	286095	+
chrVII	888462	888493	+
chrVII	888472	888503	+
chrIV	435199	435230	+
chrIV	435270	435301	+
chrIV	1353629	1353660	+
chrIV	1353644	1353675	+
chrXI	389071	389102	+
chrXI	389088	389119	+
chrXIV	609650	609681	+
chrXIV	609661	609692	+
chrXV	981571	981602	+
chrXV	981582	981613	+
chrIV	329710	329741	+
chrIV	329730	329761	+
chrII	704426	704457	+
chrII	704440	704471	+
chrXV	113938	113969	+
chrXV	113951	113982	+
chrXV	19257	19288	+
chrXV	19297	19328	+
chrXI	517098	517129	+
chrXI	517120	517151	+

## Sheet: three B2
chrII	170128	170159	-
chrII	170172	170203	-
chrII	170185	170216	-
chrIV	555272	555303	-
chrIV	555296	555327	-
chrIV	555307	555338	-
chrXV	337381	337412	-
chrXV	337393	337424	-
chrXV	337420	337451	-
chrX	113670	113701	-
chrX	113679	113710	-
chrX	113659	113690	-
chrIII	292600	292631	-
chrIII	292621	292652	-
chrIII	292586	292617	-
chrVII	508779	508810	-
chrVII	508803	508834	-
chrVII	508791	508822	-
chrXIV	196121	196152	-
chrXIV	196134	196165	-
chrXIV	196144	196175	-
chrXII	76923	76954	+
chrXII	76943	76974	+
chrXII	76975	77006	+
chrVII	203979	204010	+
chrVII	203994	204025	+
chrVII	204014	204045	+
chrIX	175220	175251	+
chrIX	175230	175261	+
chrIX	175241	175272	+
chrIX	357254	357285	+
chrIX	357283	357314	+
chrIX	357322	357353	+
chrX	730143	730174	+
chrX	730157	730188	+
chrX	730172	730203	+
chrXV	656723	656754	+
chrXV	656734	656765	+
chrXV	656754	656785	+
chrVII	999539	999570	+
chrVII	999549	999580	+
chrVII	999562	999593	+
chrXVI	418244	418275	+
chrXVI	418256	418287	+
chrXVI	418290	418321	+

## Sheet: four B2
chrIV	212534	212565	-
chrIV	212524	212555	-
chrIV	212502	212533	-
chrIV	212444	212475	-
chrXVI	73110	73141	-
chrXVI	73099	73130	-
chrXVI	73088	73119	-
chrXVI	73075	73106	-
chrIV	567567	567598	-
chrIV	567576	567607	-
chrIV	567587	567618	-
chrIV	567614	567645	-
chrV	59373	59404	-
chrV	59362	59393	-
chrV	59352	59383	-
chrV	59321	59352	-
chrXV	908369	908400	+
chrXV	908384	908415	+
chrXV	908397	908428	+
chrXV	908408	908439	+
chrIV	408146	408177	+
chrIV	408157	408188	+
chrIV	408167	408198	+
chrIV	408204	408235	+
chrIV	921795	921826	+
chrIV	921806	921837	+
chrIV	921818	921849	+
chrIV	921862	921893	+
chrVII	112163	112194	+
chrVII	112183	112214	+
chrVII	112193	112224	+
chrVII	112205	112236	+
chrVIII	64342	64373	+
chrVIII	64358	64389	+
chrVIII	64363	64394	+
chrVIII	64392	64423	+
chrXII	1007286	1007317	+
chrXII	1007296	1007327	+
chrXII	1007306	1007337	+
chrXII	1007327	1007358	+

## Sheet: five B2
chrX	99535	99566	-
chrX	99522	99553	-
chrX	99511	99542	-
chrX	99500	99531	-
chrX	99490	99521	-

## Sheet: bed all correct first B2
chrI	124442	124473	-
chrI	214946	214977	-
chrII	29038	29069	+
chrII	93630	93661	+
chrII	170185	170216	-
chrII	255006	255037	-
chrII	389200	389231	-
chrII	407939	407969	-
chrII	622835	622865	+
chrII	632118	632149	+
chrII	704418	704449	+
chrII	741678	741709	-
chrII	773940	773971	-
chrIII	11305	11336	+
chrIII	39508	39539	-
chrIII	74581	74612	+
chrIII	108896	108927	-
chrIII	166662	166693	-
chrIII	224928	224959	+
chrIII	272899	272930	-
chrIII	292622	292653	-
chrIV	15649	15680	+
chrIV	86044	86075	-
chrIV	123727	123758	-
chrIV	212535	212566	-
chrIV	253916	253947	+
chrIV	316914	316945	+
chrIV	329710	329741	+
chrIV	408146	408177	+
chrIV	435195	435226	+
chrIV	462532	462563	-
chrIV	505428	505459	-
chrIV	555307	555338	-
chrIV	567620	567651	-
chrIV	639941	639972	-
chrIV	806149	806180	+
chrIV	913975	914006	+
chrIV	921794	921825	+
chrIV	1016806	1016837	-
chrIV	1057985	1058016	+
chrIV	1166132	1166163	-
chrIV	1240950	1240981	+
chrIV	1302709	1302740	-
chrIV	1353629	1353660	+
chrIV	1462158	1462189	+
chrIX	73908	73939	-
chrIX	175220	175251	+
chrIX	247824	247855	-
chrIX	310709	310740	-
chrIX	357254	357285	+
chrIX	411910	411941	-
chrV	59373	59404	-
chrV	94111	94142	+
chrV	173727	173758	-
chrV	212467	212498	+
chrV	287602	287633	+
chrV	353608	353639	+
chrV	406820	406851	-
chrV	439013	439044	-
chrV	498923	498954	+
chrV	549559	549589	-
chrVI	68912	68943	+
chrVI	135915	135946	-
chrVI	199451	199482	+
chrVII	17814	17845	-
chrVII	112163	112194	+
chrVII	203979	204010	+
chrVII	241249	241280	+
chrVII	286043	286074	+
chrVII	421164	421195	-
chrVII	484966	484997	-
chrVII	508804	508835	-
chrVII	574739	574770	+
chrVII	659909	659940	-
chrVII	778064	778094	+
chrVII	888462	888493	+
chrVII	977816	977847	-
chrVII	999539	999570	+
chrVII	1063566	1063597	+
chrVIII	7615	7646	-
chrVIII	64342	64373	+
chrVIII	168573	168604	-
chrVIII	245800	245830	+
chrVIII	392184	392215	-
chrVIII	535548	535579	-
chrX	16510	16541	+
chrX	67682	67713	+
chrX	99535	99566	-
chrX	113679	113710	-
chrX	161815	161846	+
chrX	337374	337405	+
chrX	374998	375029	+
chrX	417312	417343	-
chrX	540646	540677	+
chrX	684074	684105	+
chrX	711987	712018	+
chrX	730143	730174	+
chrXI	55761	55792	-
chrXI	98498	98529	+
chrXI	329789	329820	-
chrXI	389071	389102	+
chrXI	417286	417317	+
chrXI	448087	448118	-
chrXII	76923	76954	+
chrXII	91483	91514	+
chrXII	231326	231357	+
chrXII	289356	289387	-
chrXII	373196	373227	-
chrXII	412765	412796	-
chrXII	512979	513010	-
chrXII	659971	660002	+
chrXII	794119	794150	-
chrXII	822103	822134	+
chrXII	888620	888651	-
chrXII	928338	928369	+
chrXII	1007286	1007317	+
chrXII	1013838	1013869	+
chrXII	1024074	1024105	-
chrXIII	31791	31822	+
chrXIII	137407	137438	+
chrXIII	286914	286945	+
chrXIII	371095	371126	+
chrXIII	433049	433080	+
chrXIII	535665	535696	-
chrXIII	634563	634594	+
chrXIII	688903	688934	-
chrXIII	758342	758372	-
chrXIII	815427	815458	+
chrXIII	878821	878852	+
chrXIII	897886	897917	-
chrXIV	28708	28738	-
chrXIV	61815	61846	+
chrXIV	196149	196180	-
chrXIV	250397	250428	-
chrXIV	322042	322073	+
chrXIV	412389	412420	-
chrXIV	546080	546111	-
chrXIV	561269	561300	-
chrXIV	609650	609681	+
chrXIV	635718	635749	-
chrXIV	691606	691637	-
chrXIV	713970	714000	+
chrXV	35823	35854	+
chrXV	72740	72771	+
chrXV	85273	85304	-
chrXV	113938	113969	+
chrXV	227611	227642	+
chrXV	277643	277674	-
chrXV	337420	337451	-
chrXV	436765	436796	-
chrXV	490004	490035	+
chrXV	600859	600890	-
chrXV	656723	656754	+
chrXV	729836	729867	+
chrXV	766769	766800	+
chrXV	783414	783445	+
chrXV	874304	874335	-
chrXV	908369	908400	+
chrXV	981571	981602	+
chrXV	1053794	1053825	+
chrXVI	73110	73141	-
chrXVI	162528	162558	+
chrXVI	289566	289597	+
chrXVI	384662	384693	+
chrXVI	418244	418275	+
chrXVI	511758	511789	+
chrXVI	563924	563955	+
chrXVI	565244	565275	+
chrXVI	633971	634001	+
chrXVI	749188	749219	+
chrXVI	842792	842823	-
chrXV	19257	19288	+
chrXI	517098	517129	+
chrI	42021	42052	-
chrII	486770	486801	-
chrII	802252	802283	+
chrIII	294802	294833	-
chrVI	118721	118753	+
chrXIV	764333	764364	+
chrXIV	89675	89706	-
chrXVI	331871	331902	+

## Sheet: A-elements
chr1	759	759	ARS102	-
chr1	6626	6626	ARS102.5	-
chr1	31008	31008	ARS104	+
chr1	42076	42076	ARS105	-
chr1	70425	70425	ARS106	-
chr1	124514	124514	ARS107	-
chr1	147544	147544	ARS108	-
chr1	159958	159958	ARS109	+
chr1	176241	176241	ARS110	+
chr1	215029	215029	ARS111	-
chr2	85	85	ARS200	+
chr2	6566	6566	ARS201	-
chr2	29000	29000	ARS201.5	+
chr2	63370	63370	ARS202	-
chr2	93546	93546	ARS203	+
chr2	143739	143739	ARS206	-
chr2	170254	170254	ARS207	-
chr2	237866	237866	ARS208	-
chr2	255077	255077	ARS209	-
chr2	326200	326200	ARS211	+
chr2	389316	389316	ARS213	-
chr2	408041	408041	ARS214	-
chr2	418010	418010	ARS215	-
chr2	486865	486865	ARS216	-
chr2	517340	517340	ARS217	-
chr2	539442	539442	ARS218	-
chr2	591470	591470	ARS219	+
chr2	622805	622805	ARS220	+
chr2	632097	632097	ARS221	+
chr2	676338	676338	ARS221.5	+
chr2	704350	704350	ARS222	+
chr2	741780	741780	ARS224	-
chr2	757494	757494	ARS225	+
chr2	774076	774076	ARS227	-
chr2	802244	802244	ARS229	+
chr3	10565	10565	ARS300	-
chr3	11261	11261	ARS301	+
chr3	14705	14705	ARS302	+
chr3	15339	15339	ARS320	+
chr3	39585	39585	ARS305	-
chr3	74525	74525	ARS306	+
chr3	108966	108966	ARS307	-
chr3	132050	132050	ARS309	+
chr3	166706	166706	ARS310	-
chr3	194353	194353	ARS313	-
chr3	197553	197553	ARS314	-
chr3	224868	224868	ARS315	+
chr3	273024	273024	ARS316	-
chr3	292680	292680	ARS317	-
chr3	294828	294828	ARS318	+
chr3	315825	315825	ARS319	+
chr4	862	862	ARS400	-
chr4	15631	15631	ARS403	+
chr4	46222	46222	ARS404	-
chr4	86117	86117	ARS405	-
chr4	123787	123787	ARS406	-
chr4	137666	137666	ARS407	+
chr4	157988	157988	ARS408	-
chr4	212586	212586	ARS409	-
chr4	253847	253847	ARS410	+
chr4	316870	316870	ARS412	+
chr4	329679	329679	ARS413	+
chr4	408141	408141	ARS414	+
chr4	435171	435171	ARS415	+
chr4	462602	462602	ARS416	-
chr4	484033	484033	ARS417	-
chr4	505516	505516	ARS417.5	-
chr4	555395	555395	ARS418	-
chr4	567675	567675	ARS419	-
chr4	629325	629325	ARS420	-
chr4	640062	640062	ARS421	-
chr4	702938	702938	ARS422	+
chr4	748557	748557	ARS422.5	+
chr4	753333	753333	ARS423	-
chr4	806113	806113	ARS425	+
chr4	913872	913872	ARS428	+
chr4	921752	921752	ARS429	+
chr4	1016848	1016848	ARS430	-
chr4	1033282	1033282	ARS430.5	+
chr4	1057903	1057903	ARS431	+
chr4	1110133	1110133	ARS431.5	-
chr4	1159455	1159455	ARS432	-
chr4	1166175	1166175	ARS432.5	-
chr4	1240938	1240938	ARS433	+
chr4	1276296	1276296	ARS434	+
chr4	1302763	1302763	ARS435	-
chr4	1353592	1353592	ARS437	+
chr4	1404341	1404341	ARS440	+
chr4	1447490	1447490	ARS441	+
chr4	1462066	1462066	ARS442	+
chr4	1487097	1487097	ARS446	-
chr4	1502794	1502794	ARS447	-
chr5	11943	11943	ARS504.2	-
chr5	59463	59463	ARS507	-
chr5	94062	94062	ARS508	+
chr5	145708	145708	ARS510	-
chr5	173802	173802	ARS511	-
chr5	212462	212462	ARS512	+
chr5	27631	27631	ARS513.5	+
chr5	278172	278172	ARS513.7	-
chr5	287574	287574	ARS514	+
chr5	301757	301757	ARS514.5	+
chr5	316624	316624	ARSe	-
chr5	353593	353593	ARS516	+
chr5	406900	406900	ARS517	-
chr5	439099	439099	ARS518	-
chr5	498896	498896	ARS520	+
chr5	549680	549680	ARS522	-
chr5	569641	569641	ARS523	+
chr6	5488	5488	ARS600.1	-
chr6	20827	20827	ARS600.4	-
chr6	32712	32712	ARS601	+
chr6	32966	32966	ARS602	-
chr6	68833	68833	ARS603	+
chr6	118689	118689	ARS603.5	-
chr6	136043	136043	ARS605	-
chr6	167732	167732	ARS606	-
chr6	199420	199420	ARS607	+
chr6	216518	216518	ARS608	+
chr6	256381	256381	ARS609	-
chr7	17915	17915	ARS700.5	-
chr7	64452	64452	ARS702	-
chr7	112131	112131	ARS704	+
chr7	117682	117682	ARS706	-
chr7	163242	163242	ARS707	+
chr7	187392	187392	ARS709	+
chr7	203978	203978	ARS710	+
chr7	241187	241187	ARS712	+
chr7	286010	286010	ARS714	+
chr7	352857	352857	ARS716	-
chr7	388840	388840	ARS717	-
chr7	421273	421273	ARS718	-
chr7	485104	485104	ARS719	-
chr7	508901	508901	ARS720	-
chr7	568654	568654	ARS721	-
chr7	574707	574707	ARS722	+
chr7	653842	653842	ARS726	-
chr7	659994	659994	ARS727	-
chr7	715321	715321	ARS728	+
chr7	778020	778020	ARS729	+
chr7	834658	834658	ARS731	-
chr7	888419	888419	ARS731.5	+
chr7	977890	977890	ARS733	-
chr7	999509	999509	ARS734	+
chr7	1063507	1063507	ARS735.5	+
chr7	1083677	1083677	ARS131a	+
chr8	5463	5463	ARS131n	-
chr8	7749	7749	ARS802	-
chr8	45789	45789	ARS804	-
chr8	64309	64309	ARS805	+
chr8	168672	168672	ARS809	-
chr8	213561	213561	ARS810
chr8	245795	245795	ARS813	+
chr8	297091	297091	ARS815	+
chr8	359705	359705	ARS816	-
chr8	392241	392241	ARS818	-
chr8	447788	447788	ARS820	-
chr8	501943	501943	ARS822	-
chr8	520398	520398	ARS823	-
chr8	535632	535632	ARS823.5	-
chr8	556147	556147	ARS824	+
chr9	7742	7742	proARS902	-
chr9	16400	16400	proARS904	+
chr9	33477	33477	ARS905	-
chr9	73962	73962	ARS907	-
chr9	80224	80224	ARS908	+
chr9	105960	105960	ARS909	-
chr9	136304	136304	ARS911	-
chr9	175180	175180	ARS912	+
chr9	214742	214742	ARS913	+
chr9	245876	245876	ARS913.5	-
chr9	247749	247749	ARS914	-
chr9	310741	310741	ARS916	-
chr9	342026	342026	ARS919	-
chr9	357234	357234	ARS920	+
chr9	411997	411997	ARS922	-
chr10	275	275	ARS1001	+
chr10	7725	7725	ARS1002	-
chr10	16473	16473	ARS1003	+
chr10	23927	23927	ARS1004	+
chr10	67671	67671	ARS1005	+
chr10	99619	99619	ARS1006	-
chr10	113743	113743	ARS1007	-
chr10	161749	161749	ARS1007.5	+
chr10	204534	204534	ARS1008	-
chr10	228871	228871	ARS1009	-
chr10	298922	298922	ARS1010	+
chr10	337359	337359	ARS1011	+
chr10	374976	374976	ARS1012	+
chr10	417389	417389	ARS1014	-
chr10	442724	442724	ARS1015	-
chr10	540615	540615	ARS1018	+
chr10	613069	613069	ARS1019	-
chr10	654543	654543	ARS1020	-
chr10	684018	684018	ARS1021	+
chr10	711973	711973	ARS1022	+
chr10	730125	730125	ARS1023	+
chr10	737204	737204	ARS1024	-
chr10	744944	744944	ARS1025	+
chr11	55860	55860	ARS1103	-
chr11	98391	98391	ARS1104.5	+
chr11	153114	153114	ARS1106	-
chr11	213660	213660	ARS1106.7	-
chr11	257940	257940	ARS1107	+
chr11	302655	302655	ARS1107.5	+
chr11	329852	329852	ARS1109	-
chr11	389031	389031	ARS1112	+
chr11	417247	417247	ARS1113	+
chr11	448192	448192	ARS1114	-
chr11	457539	457539	ARS1114.5	-
chr11	517068	517068	ARS1116	+
chr11	581903	581903	ARS1118	+
chr11	612405	612405	ARS1120	-
chr11	642790	642790	ARS1123	+
chr12	52119	52119	ARS1203	-
chr12	76895	76895	ARS1205	+
chr12	91474	91474	ARS1206	+
chr12	139817	139817	proARS1207
chr12	156708	156708	ARS1209	+
chr12	231256	231256	ARS1211	+
chr12	243733	243733	ARS1211.5	+
chr12	289414	289414	ARS1212	-
chr12	373321	373321	ARS1213	-
chr12	412847	412847	ARS1215	-
chr12	450512	450512	ARS1216	+
chr12	459002	459002	ARS1216.5	+
chr12	513077	513077	ARS1217	-
chr12	603103	603103	ARS1218	-
chr12	622850	622850	ARS1219	+
chr12	659899	659899	ARS1220	+
chr12	730531	730531	ARS1222	+
chr12	745109	745109	ARS1223	-
chr12	794201	794201	ARS1226	-
chr12	822096	822096	ARS1227	+
chr12	888734	888734	ARS1227.5	-
chr12	928294	928294	ARS1229	+
chr12	1007247	1007247	ARS1232	+
chr12	1013796	1013796	ARS1233	+
chr12	1024150	1024150	ARS1234	-
chr12	1059715	1059715	ARS1235	-
chr13	6302	6302	proARS1301	-
chr13	31773	31773	ARS1303	+
chr13	40076	40076	ARS1304	-
chr13	94384	94384	ARS1305	-
chr13	137328	137328	ARS1307	+
chr13	159053	159053	ARS1307.5	+
chr13	183867	183867	ARS1308	-
chr13	263133	263133	ARS1309	+
chr13	286852	286852	ARS1310	+
chr13	371027	371027	ARS1312	+
chr13	433022	433022	ARS1315	+
chr13	468244	468244	ARS1316	+
chr13	503628	503628	ARS1319	+
chr13	535764	535764	ARS1320	-
chr13	554608	554608	ARS1322	-
chr13	611325	611325	ARS1323	+
chr13	634528	634528	ARS1324	+
chr13	649369	649369	ARS1325	+
chr13	689000	689000	ARS1326	-
chr13	758411	758411	ARS1327	-
chr13	772684	772684	ARS1328	+
chr13	805169	805169	ARS1329	+
chr13	815398	815398	ARS1330	+
chr13	878727	878727	ARS1331.7	+
chr13	897970	897970	ARS1332	-
chr14	28648	28648	ARS1405	-
chr14	61702	61702	ARS1406	+
chr14	89729	89729	ARS1407	-
chr14	126691	126691	ARS1410	-
chr14	169743	169743	ARS1411	-
chr14	196220	196220	ARS1412	-
chr14	250487	250487	ARS1413	-
chr14	280052	280052	ARS1414	+
chr14	322010	322010	ARS1415	+
chr14	412435	412435	ARS1417	-
chr14	449530	449530	ARS1419	-
chr14	499047	499047	ARS1420	+
chr14	546143	546143	ARS1421	-
chr14	561324	561324	ARS1422	-
chr14	609553	609553	ARS1424	+
chr14	635827	635827	ARS1426	-
chr14	691674	691674	ARS1427	-
chr14	713952	713952	ARS1428	+
chr14	738726	738726	ARS1428.5	+
chr14	764281	764281	ARS1429	-
chr15	19181	19181	proARS1506
chr15	35721	35721	ARS1506.5	+
chr15	72695	72695	ARS1507	+
chr15	85354	85354	ARS1508	-
chr15	113903	113903	ARS1509	+
chr15	167010	167010	ARS1510	+
chr15	227552	227552	ARS1510.5	+
chr15	277726	277726	ARS1511	-
chr15	309258	309258	ARS1512	-
chr15	337477	337477	ARS1513	-
chr15	436861	436861	ARS1513.5	-
chr15	489897	489897	ARS1514	+
chr15	566591	566591	ARS1516	-
chr15	600931	600931	ARS1517	-
chr15	656708	656708	ARS1519	+
chr15	681359	681359	ARS1520	-
chr15	729802	729802	ARS1521	+
chr15	766696	766696	ARS1523	+
chr15	783393	783393	ARS1524	+
chr15	874365	874365	ARS1526	-
chr15	908320	908320	ARS1528	+
chr15	981518	981518	ARS1529	+
chr15	1053705	1053705	ARS1529.5	+
chr16	7172	7172	ARS1601	-
chr16	43156	43156	ARS1604	-
chr16	73198	73198	ARS1605	-
chr16	116600	116600	ARS1607	+
chr16	162479	162479	proARS1608	+
chr16	289538	289538	ARS1614	+
chr16	331791	331791	ARS1617	+
chr16	384604	384604	ARS1618	+
chr16	418191	418191	ARS1619	+
chr16	456757	456757	ARS1620.5	-
chr16	511715	511715	ARS1621	+
chr16	563889	563889	ARS1622	+
chr16	565126	565126	ARS1622.5	+
chr16	584410	584410	ARS1622.7	-
chr16	633933	633933	ARS1623	+
chr16	684442	684442	ARS1624	+
chr16	695477	695477	ARS1625	+
chr16	749128	749128	ARS1626	+
chr16	777092	777092	ARS1626.5	-
chr16	819337	819337	ARS1627	-
chr16	842850	842850	ARS1628	-
chr16	880918	880918	ARS1630	+
chr16	933164	933164	ARS1631	-
chr16	942438	942438	proARS1632	+

## Sheet: MCM2-7DH in G1
chrI	705	767
chrI	42042	42104
chrI	70369	70431
chrI	124456	124518
chrI	147459	147521
chrI	215021	215083
chrII	6514	6576
chrII	63304	63366
chrII	143727	143789
chrII	170217	170279
chrII	237811	237873
chrII	255028	255090
chrII	389260	389322
chrII	407986	408048
chrII	417948	418010
chrII	486833	486895
chrII	539373	539435
chrII	741723	741785
chrII	774031	774093
chrII	802251	802313
chrIII	39514	39576
chrIII	108923	108985
chrIII	166686	166748
chrIII	197528	197590
chrIII	272950	273012
chrIII	292635	292697
chrIV	819	881
chrIV	46271	46333
chrIV	86076	86138
chrIV	123724	123786
chrIV	212525	212587
chrIV	462543	462605
chrIV	483967	484029
chrIV	505449	505511
chrIV	555337	555399
chrIV	567621	567683
chrIV	629265	629327
chrIV	640013	640075
chrIV	753268	753330
chrIV	1016755	1016817
chrIV	1159371	1159433
chrIV	1166105	1166167
chrIV	1302748	1302810
chrIV	1487014	1487076
chrIV	1502725	1502787
chrIX	7715	7777
chrIX	33495	33557
chrIX	73965	74027
chrIX	105895	105957
chrIX	136244	136306
chrIX	245882	245944
chrIX	247751	247813
chrIX	310679	310741
chrIX	341967	342029
chrIX	411949	412011
chrV	11884	11946
chrV	59406	59468
chrV	145641	145703
chrV	173673	173933
chrV	278114	278176
chrV	406850	406912
chrV	439034	439096
chrV	549598	549660
chrVI	5440	5502
chrVI	20794	20856
chrVI	32913	32975
chrVI	118665	118727
chrVI	136000	136062
chrVI	167665	167727
chrVI	256329	256391
chrVII	17877	17939
chrVII	64395	64457
chrVII	352792	352854
chrVII	388781	388843
chrVII	421214	421276
chrVII	485054	485116
chrVII	508857	508919
chrVII	568605	568667
chrVII	653769	653831
chrVII	659939	660001
chrVII	834610	834672
chrVII	977826	977888
chrVIII	5439	5485
chrVIII	7696	7758
chrVIII	45760	45822
chrVIII	168634	168696
chrVIII	392183	392245
chrVIII	447716	447778
chrVIII	501885	501947
chrVIII	535584	535646
chrX	7698	7760
chrX	99565	99627
chrX	113728	113790
chrX	204464	204526
chrX	228808	228870
chrX	417332	417394
chrX	442665	442727
chrX	455269	455529
chrX	613079	613141
chrX	654554	654616
chrX	737180	737242
chrXI	55806	55868
chrXI	153059	153121
chrXI	196081	196341
chrXI	329793	329855
chrXI	417221	417283
chrXI	448113	448175
chrXI	517094	517156
chrXI	612374	612436
chrXII	289363	289425
chrXII	373274	373336
chrXII	412799	412861
chrXII	513023	513085
chrXII	603065	603127
chrXII	745037	745099
chrXII	794134	794196
chrXII	888676	888738
chrXII	1024082	1024144
chrXII	1059619	1059681
chrXIII	6256	6318
chrXIII	40055	40117
chrXIII	183805	183867
chrXIII	535672	535734
chrXIII	554526	554588
chrXIII	688932	688994
chrXIII	758313	758375
chrXIII	897906	897968
chrXIV	28647	28709
chrXIV	89668	89730
chrXIV	126631	126693
chrXIV	169773	169835
chrXIV	196165	196227
chrXIV	250425	250487
chrXIV	412383	412445
chrXIV	449469	449531
chrXIV	546095	546157
chrXIV	561279	561341
chrXIV	635799	635861
chrXIV	691557	691619
chrXIV	764338	764400
chrXV	85287	85349
chrXV	277668	277730
chrXV	309204	309266
chrXV	337432	337494
chrXV	436807	436869
chrXV	566586	566648
chrXV	600898	600960
chrXV	681279	681341
chrXV	874295	874357
chrXVI	7135	7197
chrXVI	43155	43217
chrXVI	73129	73191
chrXVI	456702	456764
chrXVI	584409	584471
chrXVI	777047	777109
chrXVI	819275	819337
chrXVI	842806	842868
chrXVI	933107	933169
chrI	30991	31053
chrI	159952	160014
chrI	176251	176313
chrII	28920	28982
chrII	93469	93531
chrII	326129	326191
chrII	622798	622860
chrII	632076	632138
chrII	704271	704333
chrII	757487	757549
chrIII	11265	11327
chrIII	14686	14748
chrIII	15297	15359
chrIII	74522	74584
chrIII	132046	132108
chrIII	194365	194427
chrIII	224861	224923
chrIII	294837	294899
chrIII	315789	315851
chrIV	15549	15611
chrIV	253846	253908
chrIV	316863	316925
chrIV	329675	329737
chrIV	408121	408183
chrIV	435130	435192
chrIV	702945	703007
chrIV	806095	806157
chrIV	913876	913938
chrIV	921753	921815
chrIV	1057916	1057978
chrIV	1240943	1241005
chrIV	1276295	1276357
chrIV	1353582	1353644
chrIV	1404339	1404401
chrIV	1447444	1447506
chrIV	1462057	1462119
chrIX	80225	80287
chrIX	175143	175205
chrIX	214831	214893
chrIX	357149	357211
chrV	94058	94120
chrV	212480	212542
chrV	287442	287702
chrV	353589	353651
chrV	498888	498950
chrV	569602	569664
chrVI	32702	32764
chrVI	68824	68886
chrVI	199412	199474
chrVI	216489	216551
chrVII	112130	112192
chrVII	163231	163293
chrVII	203924	203986
chrVII	241167	241229
chrVII	285996	286058
chrVII	574696	574758
chrVII	715329	715391
chrVII	778015	778077
chrVII	888421	888483
chrVII	999456	999518
chrVII	1063507	1063569
chrVII	1083665	1083727
chrVIII	64306	64368
chrVIII	245767	245829
chrVIII	297077	297139
chrVIII	556144	556206
chrX	16453	16515
chrX	23878	23940
chrX	67662	67724
chrX	161741	161803
chrX	298916	298978
chrX	337268	337330
chrX	374970	375032
chrX	540562	540624
chrX	684024	684086
chrX	711986	712048
chrX	730155	730217
chrX	744938	745000
chrXI	98448	98510
chrXI	213585	213647
chrXI	257941	258003
chrXI	362872	363132
chrXI	389016	389078
chrXI	457543	457605
chrXI	581885	581947
chrXI	642768	642830
chrXII	76890	76952
chrXII	91469	91531
chrXII	156680	156742
chrXII	231274	231336
chrXII	243740	243802
chrXII	622843	622905
chrXII	659905	659967
chrXII	730605	730667
chrXII	822096	822158
chrXII	928237	928299
chrXII	1007247	1007309
chrXII	1013711	1013773
chrXIII	31741	31803
chrXIII	137323	137385
chrXIII	159092	159154
chrXIII	263131	263193
chrXIII	286832	286894
chrXIII	371034	371096
chrXIII	433002	433064
chrXIII	503599	503661
chrXIII	611325	611387
chrXIII	634544	634606
chrXIII	649308	649370
chrXIII	772701	772763
chrXIII	805175	805237
chrXIII	815396	815458
chrXIII	878741	878803
chrXIV	61715	61777
chrXIV	280072	280134
chrXIV	322011	322073
chrXIV	499045	499107
chrXIV	609558	609620
chrXIV	713893	713955
chrXIV	738715	738777
chrXV	35734	35796
chrXV	72715	72777
chrXV	113900	113962
chrXV	167033	167095
chrXV	227569	227631
chrXV	489873	489935
chrXV	656652	656714
chrXV	729760	729822
chrXV	766701	766763
chrXV	783352	783414
chrXV	908293	908355
chrXV	981525	981587
chrXV	1053703	1053765
chrXVI	116623	116685
chrXVI	162480	162542
chrXVI	289528	289590
chrXVI	331811	331873
chrXVI	384603	384665
chrXVI	418186	418248
chrXVI	511690	511752
chrXVI	563891	563953
chrXVI	565151	565213
chrXVI	633947	634009
chrXVI	684431	684493
chrXVI	695488	695550
chrXVI	749098	749160
chrXVI	880857	880919
chrXVI	942402	942464
chrII	792095	792355
chrXV	19172	19234

## Sheet: ORC in G2
C1					C2					C3					C4				nb. Expand by 38bp on each side
chrV	287573	287575	+		chrXIII	286851	286853	+		chrXIV	561323	561325	-		chrXV	520962	520964	-
chrII	63369	63371	-		chrIII	292679	292681	-		chrV	173801	173803	-		chrIII	114625	114627	-
chrIX	7741	7743	-		chrX	67670	67672	+		chrVII	163241	163243	+		chrIII	166705	166707	-
chrX	7724	7726	-		chrXIV	412434	412436	-		chrXI	98390	98392	+		chrIV	1016847	1016849	-
chrIV	702937	702939	+		chrXIV	280051	280053	+		chrXII	603102	603104	-		chrXV	227551	227553	+
chrIV	462601	462603	-		chrXII	513076	513078	-		chrI	31007	31009	+		chrXV	874364	874366	-
chrXVI	819336	819338	-		chrXIV	449529	449531	-		chrXI	517049	517051	+		chrXVI	584409	584411	-
chrXVI	942437	942439	+		chrVII	508900	508902	-		chrXV	72694	72696	+		chrXIII	772683	772685	+
chrX	204533	204535	-		chrI	42097	42099	-		chrI	159957	159959	+		chrV	278171	278173	-
chrII	741779	741781	-		chrXVI	162478	162480	+		chrIV	629324	629326	-		chrVII	203977	203979	+
chrXIV	499046	499048	+		chrIV	1276295	1276297	+		chrXII	730530	730532	+		chrIV	567674	567676	-
chrII	170253	170255	-		chrXII	794200	794202	-		chrIV	484032	484034	-		chrII	389315	389317	-
chrIV	1447489	1447491	+		chrXVI	384603	384605	+		chrXVI	563888	563890	+		chrXV	85353	85355	-
chrIV	212585	212587	-		chrII	255076	255078	-		chrIV	1166174	1166176	-		chrIII	74524	74526	+
chrXII	289413	289415	-		chrVIII	447787	447789	-		chrII	237896	237898	-		chrIV	408140	408142	+
chrIII	15301	15303	+		chrXIII	535763	535765	-		chrXVI	565125	565127	+		chrXV	489896	489898	+
chrIV	753332	753334	-		chrXIV	89749	89751	-		chrX	228870	228872	-		chrVI	216487	216489	+
chrIII	14704	14706	+		chrIX	33476	33478	-		chrVIII	392240	392242	-		chrX	23926	23928	+
chrXVI	7171	7173	-		chrXVI	116599	116601	+		chrII	198415	198417	-		chrXIII	611324	611326	+
chrIII	10564	10566	-		chrXVI	880917	880919	+		chrXIII	159052	159054	+		chrXV	981517	981519	+
chrIX	245875	245877	-		chrIX	411996	411998	-		chrXV	436860	436862	-		chrXIV	691673	691675	-
chrIX	247748	247750	-		chrXIV	61701	61703	+		chrXI	153113	153115	-		chrXV	1053704	1053706	+
chrXVI	695476	695478	+		chrIV	1240937	1240939	+		chrXI	612404	612406	-		chrII	757493	757495	+
chrIII	11260	11262	+		chrXIII	183866	183868	-		chrVII	778019	778021	+		chrVII	187391	187393	+
chrI	215028	215030	-		chrXIV	546142	546144	-		chrIV	1057902	1057904	+		chrXIV	713951	713953	+
chrV	498895	498897	+		chrX	113742	113744	-		chrXIV	169742	169744	-		chrXII	822095	822097	+
chrX	744943	744945	+		chrX	442723	442725	-		chrXII	1024149	1024151	-		chrVI	68832	68834	+
chrI	758	760	-		chrXV	656707	656709	+		chrIII	132049	132051	+		chrII	28999	29001	+
chrVIII	535631	535633	-		chrXV	600930	600932	-		chrV	212461	212463	+		chrXI	196209	196211	-
chrVIII	556146	556148	+		chrIV	86116	86118	-		chrVII	1063506	1063508	+		chrXI	363000	363002	-
chrVII	1083676	1083678	+		chrVII	659993	659995	-		chrV	145707	145709	-		chrVII	568653	568655	-
chrIV	1462065	1462067	+		chrXI	213659	213661	-		chrXIII	554607	554609	-		chrXII	1007246	1007248	+
chrXVI	777091	777093	-		chrVII	574706	574708	+		chrVII	352856	352858	-		chrXIII	649368	649370	+
chrVI	5487	5489	-		chrIV	1302762	1302764	-		chrVII	112130	112132	+		chrV	406899	406901	-
chrVII	485103	485105	-		chrXII	928293	928295	+		chrVI	118747	118749	-		chrXIII	815397	815399	+
chrX	417388	417390	-		chrXI	417246	417248	+		chrX	613068	613070	-		chrIII	108965	108967	-
chrXII	243732	243734	+		chrXIII	31772	31774	+		chrXIII	688999	689001	-		chrII	802327	802329	-
chrXI	642789	642791	+		chrXVI	511714	511716	+		chrXV	566590	566592	-		chrXIV	28647	28649	-
chrX	684017	684019	+		chrIX	175179	175181	+		chrX	540614	540616	+		chrII	418009	418011	-
chrVII	421272	421274	-		chrIV	253846	253848	+		chrIV	435170	435172	+		chrXV	19180	19182	+
chrIII	315824	315826	+		chrVIII	245794	245796	+		chrIV	316869	316871	+		chrIV	123786	123788	-
chrVI	199419	199421	+		chrIV	46221	46223	-		chrVII	834657	834659	-		chrVII	715320	715322	+
chrXII	91473	91475	+		chrXIV	196219	196221	-		chrXV	113902	113904	+		chrVIII	520397	520399	-
chrXI	448191	448193	-		chrXVI	633932	633934	+		chrVII	1002378	1002380	+		chrII	326199	326201	+
chrII	6565	6567	-		chrXV	167009	167011	+		chrXII	156707	156709	+		chrIV	1110132	1110134	-
chrVIII	7748	7750	-		chrIII	197552	197554	-		chrII	704349	704351	+		chrX	161748	161750	+
chrIV	1502793	1502795	-		chrXVI	418190	418192	+		chrIX	310740	310742	-		chrXIII	878726	878728	+
chrXIV	738725	738727	+		chrIV	1353591	1353593	+		chrIV	921751	921753	+		chrVI	104572	104574	-
chrVIII	5462	5464	-		chrV	94061	94063	+		chrIX	136303	136305	-		chrV	11942	11944	-
chrXI	581902	581904	+		chrII	408040	408042	-		chrVIII	45788	45790	-		chrV	27630	27632	+
chrVI	136042	136044	-		chrV	353592	353594	+		chrXII	373320	373322	-		chrIX	357233	357235	+
chrII	486896	486898	-		chrIV	1404340	1404342	+		chrXV	729801	729803	+		chrI	147543	147545	-
chrVIII	297090	297092	+		chrXI	329851	329853	-		chrXIII	634527	634529	+		chrXVI	842849	842851	-
chrVI	256380	256382	-		chrXV	681358	681360	-		chrXIV	635826	635828	-		chrXVI	684416	684418	+
chrXIII	503627	503629	+		chrXIII	263132	263134	+		chrXVI	289537	289539	+		chrX	711972	711974	+
chrV	569640	569642	+		chrVI	32711	32713	+		chrIII	224867	224869	+		chrIV	15630	15632	+
chrII	622804	622806	+		chrXII	231255	231257	+		chrXIII	805168	805170	+		chrX	730124	730126	+
chrXIII	137327	137329	+		chrXIV	322009	322011	+		chrXIV	250486	250488	-		chrIX	105959	105961	-
chrIV	806112	806114	+		chrXI	55859	55861	-		chrXII	745108	745110	-		chrXII	622849	622851	+
chrIII	39584	39586	-		chrVI	32965	32967	-		chrXI	457538	457540	-		chrIX	80223	80225	+
chrXIII	6301	6303	-		chrVII	888418	888420	+		chrV	59462	59464	-		chrXII	1013795	1013797	+
chrXV	277725	277727	-		chrXI	389030	389032	+		chrV	549679	549681	-		chrI	176240	176242	+
chrX	375877	375879	-		chrXVI	43155	43157	-		chrVI	20826	20828	-		chrXIV	126690	126692	-
chrIV	555394	555396	-		chrX	455397	455399	-		chrVIII	501942	501944	-		chrX	16472	16474	+
chrX	374975	374977	+		chrVII	286009	286011	+		chrXIII	758410	758412	-		chrXVI	749127	749129	+
chrIX	342025	342027	-		chrVIII	64308	64310	+		chrXIII	40141	40143	-		chrVI	127872	127874	+
chrVIII	133531	133533	-		chrV	439098	439100	-		chrIV	1487096	1487098	-		chrII	774075	774077	-
chrXI	257939	257941	+		chrVII	64451	64453	-		chrVI	167731	167733	-		chrXII	1059714	1059716	-
chrXIII	897969	897971	-		chrX	274	276	+		chrIV	640061	640063	-		chrVII	653841	653843	-
chrXVI	73197	73199	-		chrIX	73961	73963	-		chrXIII	433021	433023	+		chrII	632096	632098	+
chrIV	329678	329680	+		chrXV	309257	309259	-		chrIV	1159454	1159456	-		chrX	298921	298923	+
chrI	124513	124515	-		chrVII	999508	999510	+		chrVIII	359704	359706	-		chrXII	76893	76895	+
chrIV	861	863	-		chrII	792226	792228	+		chrXV	766695	766697	+		chrVII	388839	388841	-
chrVII	17914	17916	-		chrXII	659898	659900	+		chrXVI	933163	933165	-		chrXVI	331762	331764	+
chrXV	908319	908321	+		chrI	70424	70426	-		chrXIV	764350	764352	-		chrXIV	609552	609554	+
chrX	337358	337360	+		chrVIII	168671	168673	-		chrII	93545	93547	+		chrX	737203	737205	-
chrIII	294827	294829	+		chrX	99618	99620	-		chrVII	977889	977891	-		chrII	539454	539456	-
chrII	143738	143740	-		chrXII	888733	888735	-		chrIX	214741	214743	+		chrVII	241186	241188	+
chrIV	913871	913873	+		chrXIII	371026	371028	+		chrXVI	456756	456758	-		chrIII	273023	273025	-
chrXV	337476	337478	-		chrIV	505515	505517	-		chrIII	194316	194318	+		chrXV	35720	35722	+
chrXV	783392	783394	+		chrXII	412846	412848	-		chrX	654542	654544	-

[truncated: 1 more sheets: non-origin binders]
