# Supplementary material for: MCM2-7 loading-dependent ORC release ensures genome-wide origin licensing
Source: Nat Commun. 2024 Aug 24;15:7306. doi: 10.1038/s41467-024-51538-9 (PMC11344781; doi:10.1038/s41467-024-51538-9)
Supplement: Supplementary file 6 — Source Data [file 41467_2024_51538_MOESM6_ESM.xlsx]

## Sheet: Fig.1, 2A, 4A, S1, S3, S7,S8
The raw sequencing data generated in this study have been deposited in the GEO repository database under accession code GSE240779
[https://www.ncbi.nlm.nih.gov/geo/query/acc.cgi?acc=GSE240779]
Coordinate files for MCM2-7-DH, ORC, A-elements and B2-elements are available in the supplementary information (Supplementary Data 1).

## Sheet: Fig. 2B
C1 G2	C1 G2	C2 G2	C2 G1	C3 G2	C3 G1	C4 G2	C4 G1
5814	1306	1179	692	482	622	130	286
5493	2424	1175	926	471	649	129	143
4539	1835	1156	264	463	301	126	386
4519	704	1153	980	456	454	121	236
4404	722	1153	617	452	546	119	191
3893	1679	1152	582	443	502	117	518
3741	1654	1134	869	441	582	116	227
3657	1844	1117	604	436	848	115	480
3639	1107	1102	633	435	409	112	608
3557	2090	1099	599	434	621	111	424
3463	2002	1086	1004	431	443	110	413
3411	887	1075	952	430	429	108	682
3345	1620	1069	727	425	376	108	369
3275	2188	1048	306	416	588	106	207
3154	1800	1037	821	402	580	106	99
3085	7182	1036	1094	402	636	104	215
2891	1264	1025	1013	390	680	101	491
2818	3040	990	853	379	382	97	242
2668	3091	975	763	376	379	95	222
2634	2024	956	663	364	525	95	171
2618	373	954	814	361	712	91	482
2615	559	952	493	349	427	91	284
2582	438	946	1517	347	638	88	160
2576	2692	943	1037	343	1039	87	165
2503	1273	941	550	321	338	85	235
2421	1582	920	458	320	753	83	168
2418	1203	913	869	314	810	82	261
2383	1527	897	936	306	814	75	153
2346	1894	896	391	304	558	74	161
2332	1295	892	503	302	401	73	352
2323	1588	885	1124	293	345	73	179
2285	762	864	854	292	338	69	102
2276	1724	856	708	290	396	68	183
2198	2597	853	467	290	367	68	217
2184	554	819	727	287	485	67	98
2161	488	815	595	285	318	65	227
2133	774	763	479	277	652	62	441
2107	351	761	965	277	580	60	60
2075	695	760	579	276	485	60	200
2038	1051	759	353	269	468	59	109
2021	766	756	651	264	589	57	264
1981	2001	748	661	258	288	56	180
1958	1942	746	777	254	253	56	317
1943	668	716	791	253	420	55	89
1868	1486	712	710	252	689	54	48
1821	2042	707	851	249	218	54	132
1804	524	705	584	248	385	51	265
1740	757	682	631	238	329	50	480
1734	598	672	442	237	341	48	187
1719	1737	652	576	236	353	48	123
1701	241	632	214	230	492	46	134
1693	827	632	434	227	391	46	181
1687	1050	621	284	224	227	44	168
1684	1764	612	504	220	344	43	72
1669	2100	609	1126	212	231	42	297
1639	935	582	957	211	323	42	134
1637	1008	582	640	209	354	41	61
1625	2062	580	361	201	284	40	331
1610	1242	579	782	193	376	36	263
1605	1728	561	559	193	385	35	332
1600	512	560	397	191	450	34	78
1591	1696	557	415	187	258	34	86
1512	744	554	696	185	563	34	119
1483	812	541	1555	185	788	33	181
1477	319	539	490	184	262	32	365
1458	958	538	315	178	200	32	218
1442	985	536	530	176	555	31	70
1424	654	534	624	174	250	30	57
1398	694	530	347	171	619	30	264
1367	953	528	374	167	461	29	323
1345	1057	526	468	161	389	26	51
1343	3527	523	573	159	418	23	153
1321	394	521	496	152	276	22	71
1308	827	516	691	152	131	22	385
1283	718	514	317	150	458	21	97
1264	1024	509	408	139	631	21	235
1246	1637	504	754	137	234	17	134
1222	641	503	758	137	119	14	193
1219	742	491	728	135	689	13	73
1194	614	489	369	132	605	5	46
1191	1031	482	311	132	236
z	-6.4762		-3.9738		-7.2766		-7.7069
p values	4.7e-11		3.54e-05		1.71e-13		6.45e-15

## Sheet: Fig. 2C
C1	C2	C3	C4
2713	2491	1478	840
1228	943	1572	1475
2395	870	1120	1671
3579	1529	270	958
3684	1257	666	1578
2047	1709	1212	4303
2048	2469	311	1576
2626	1136	625	545
2027	2181	969	1052
2462	1325	1804	746
1388	1020	1076	915
2148	230	485	2059
1773	3325	1397	1075
401	3117	845	989
1117	1372	704	114
1539	1141	2346	1818
2032	1668	2855	959
1508	1261	1193	3118
1477	850	965	1527
653	1426	1889	2551
1936	1253	1655	1057
1641	894	86	1859
1676	591	688	812
1241	1081	1273	880
2085	1259	776	550
1641	777	970	386
1758	1010	365	1154
2027	535	1308	986
2601	710	1730	921
2027	544	536	1285
1742	1368	1129	1632
1617	679	1689	541
1222	1692	1141	689
1354	1035	923	857
1931	1081	1602	905
2409	1348	1484	795
1742	1189	1314	1780
7841	1197	1478	312
2432	1127	1152	671
3151	817	1357	504
2045	1877	1761	1598
1315	1592	694	476
438	1090	593	963
3930	1654	539	863
915	2611	1125	150
801	1047	923	678
1306	1457	1189	1576
3129	3393	626	1630
2058	1530	286	1090
1092	969	354	480
1486	4434	1563	654
2047	1122	4007	994
1112	1447	1294	1011
1951	463	993	235
646	1069	1176	757
1238	1156	563	439
2072	450	843	21
429	1023	1610	997
1247	797	1088	953
4105	837	1844	1719
2385	881	1265	194
1672	848	772	396
2615	1986	479	524
1671	17836	1174	1110
1368	973	750	833
1073	903	1801	434
2394	661	532	1012
2322	749	314	31
1882	1213	1106	1100
364	1094	868	4
1519	957	1009	50
974	286	1193	161
1523	941	1304	18
1360	3531	1765	1679
998	1126	2554	2286
1194	1536	2282	1064
1296	1464	1596	653
2331	304	1130	2514
814	1411	540	656
948	2560	1927	5
1362	1020	399	57
	-3.5854	-1.2971	-2.2788	z
	0.00034	0.1936	0.0226	p values

## Sheet: Fig. 2D
LOGO C1	Logo	E-value	Sites	Width	More	Submit/Download
1	+	4.1e-198	82	34	↧	⇢
	-
Stopped because requested number of motifs (1) found.
Role	Source	PSP Source	Alphabet	Sequence Count	Total Size
Primary Sequences	G1_sequences_25.txt		DNA	82	8200
Control Sequences	--none--		DNA	0	0
Name	Freq.	Bg.				Bg.	Freq.	Name
Adenine	0.354	0.354	A	~	T	0.354	0.354	Thymine
Cytosine	0.146	0.146	C	~	G	0.146	0.146	Guanine
Motif Site Distribution	ZOOPS: Zero or one site per sequence OOPS: Exactly one site per sequence ANR: Any number of sites per sequence
Objective Function	E-value of product of p-values
Starting Point Function	E-value of product of p-values
Site Strand Handling	This alphabet only has one strand Sites must be on the given strand Sites may be on either strand
Maximum Number of Motifs	1
Motif E-value Threshold	no limit
Minimum Motif Width	30
Maximum Motif Width	35
Minimum Sites per Motif	2
Maximum Sites per Motif	82
Bias on Number of Sites	0.8
Sequence Prior	Simple Dirichlet Dirichlet Mixture Mega-weight Dirichlet Mixture Mega-weight Dirichlet Mixture Plus Add One
Sequence Prior Source	built from the (primary) sequences
Sequence Prior Strength	0.01
EM Starting Point Source	From substrings in input sequences From strings on command line (-cons)
EM Starting Point Map Type	Uniform Point Accepted Mutation
EM Starting Point Fuzz	0.5
EM Maximum Iterations	50
EM Improvement Threshold	1e-05
Maximum Search Size	8200
Maximum Number of Sites for E-values	1000
Trim Gap Open Cost	11
Trim Gap Extend Cost	1
End Gap Treatment	No cost Same cost as other gaps
Show Advanced Settings Hide Advanced Settings
LOGO C2	Logo	E-value	Sites	Width	More	Submit/Download
1	+	2.5e-77	73	36	↧	⇢
	-
Stopped because requested number of motifs (1) found.
Role	Source	PSP Source	Alphabet	Sequence Count	Total Size
Primary Sequences	G2_sequences_25.txt		DNA	81	8100
Control Sequences	--none--		DNA	0	0
Name	Freq.	Bg.				Bg.	Freq.	Name
Adenine	0.361	0.361	A	~	T	0.361	0.361	Thymine
Cytosine	0.139	0.139	C	~	G	0.139	0.139	Guanine
Motif Site Distribution	ZOOPS: Zero or one site per sequence OOPS: Exactly one site per sequence ANR: Any number of sites per sequence
Objective Function	E-value of product of p-values
Starting Point Function	E-value of product of p-values
Site Strand Handling	This alphabet only has one strand Sites must be on the given strand Sites may be on either strand
Maximum Number of Motifs	1
Motif E-value Threshold	no limit
Minimum Motif Width	32
Maximum Motif Width	36
Minimum Sites per Motif	2
Maximum Sites per Motif	405
Bias on Number of Sites	0.8
Sequence Prior	Simple Dirichlet Dirichlet Mixture Mega-weight Dirichlet Mixture Mega-weight Dirichlet Mixture Plus Add One
Sequence Prior Source	built from the (primary) sequences
Sequence Prior Strength	0.01
EM Starting Point Source	From substrings in input sequences From strings on command line (-cons)
EM Starting Point Map Type	Uniform Point Accepted Mutation
EM Starting Point Fuzz	0.5
EM Maximum Iterations	50
EM Improvement Threshold	1e-05
Maximum Search Size	8100
Maximum Number of Sites for E-values	1000
Trim Gap Open Cost	11
Trim Gap Extend Cost	1
End Gap Treatment	No cost Same cost as other gaps
Show Advanced Settings Hide Advanced Settings
LOGO C3	Logo	E-value	Sites	Width	More	Submit/Download
1	+	9e-83	79	33	↧	⇢
	-
Stopped because requested number of motifs (1) found.
Role	Source	PSP Source	Alphabet	Sequence Count	Total Size
Primary Sequences	G3_sequences_25.txt		DNA	81	8100
Control Sequences	--none--		DNA	0	0
Name	Freq.	Bg.				Bg.	Freq.	Name
Adenine	0.367	0.367	A	~	T	0.367	0.367	Thymine
Cytosine	0.133	0.133	C	~	G	0.133	0.133	Guanine
Motif Site Distribution	ZOOPS: Zero or one site per sequence OOPS: Exactly one site per sequence ANR: Any number of sites per sequence
Objective Function	E-value of product of p-values
Starting Point Function	E-value of product of p-values
Site Strand Handling	This alphabet only has one strand Sites must be on the given strand Sites may be on either strand
Maximum Number of Motifs	1
Motif E-value Threshold	no limit
Minimum Motif Width	32
Maximum Motif Width	33
Minimum Sites per Motif	2
Maximum Sites per Motif	81
Bias on Number of Sites	0.8
Sequence Prior	Simple Dirichlet Dirichlet Mixture Mega-weight Dirichlet Mixture Mega-weight Dirichlet Mixture Plus Add One
Sequence Prior Source	built from the (primary) sequences
Sequence Prior Strength	0.01
EM Starting Point Source	From substrings in input sequences From strings on command line (-cons)
EM Starting Point Map Type	Uniform Point Accepted Mutation
EM Starting Point Fuzz	0.5
EM Maximum Iterations	50
EM Improvement Threshold	1e-05
Maximum Search Size	8100
Maximum Number of Sites for E-values	1000
Trim Gap Open Cost	11
Trim Gap Extend Cost	1
End Gap Treatment	No cost Same cost as other gaps
Show Advanced Settings Hide Advanced Settings
LOGO C4	Logo	E-value	Sites	Width	More	Submit/Download
1	+	3.6e-57	57	33	↧	⇢
	-
Stopped because requested number of motifs (1) found.
Role	Source	PSP Source	Alphabet	Sequence Count	Total Size
Primary Sequences	G4_sequences_25.txt		DNA	82	8200
Control Sequences	--none--		DNA	0	0
Name	Freq.	Bg.				Bg.	Freq.	Name
Adenine	0.362	0.362	A	~	T	0.362	0.362	Thymine
Cytosine	0.138	0.138	C	~	G	0.138	0.138	Guanine
Motif Site Distribution	ZOOPS: Zero or one site per sequence OOPS: Exactly one site per sequence ANR: Any number of sites per sequence
Objective Function	E-value of product of p-values
Starting Point Function	E-value of product of p-values
Site Strand Handling	This alphabet only has one strand Sites must be on the given strand Sites may be on either strand
Maximum Number of Motifs	1
Motif E-value Threshold	no limit
Minimum Motif Width	33
Maximum Motif Width	36
Minimum Sites per Motif	2
Maximum Sites per Motif	410
Bias on Number of Sites	0.8
Sequence Prior	Simple Dirichlet Dirichlet Mixture Mega-weight Dirichlet Mixture Mega-weight Dirichlet Mixture Plus Add One
Sequence Prior Source	built from the (primary) sequences
Sequence Prior Strength	0.01
EM Starting Point Source	From substrings in input sequences From strings on command line (-cons)
EM Starting Point Map Type	Uniform Point Accepted Mutation
EM Starting Point Fuzz	0.5
EM Maximum Iterations	50
EM Improvement Threshold	1e-05
Maximum Search Size	8200
Maximum Number of Sites for E-values	1000
Trim Gap Open Cost	11
Trim Gap Extend Cost	1
End Gap Treatment	No cost Same cost as other gaps
Show Advanced Settings Hide Advanced Settings
LOGO Eaton et al., 2010
1		734		766		1_766_‐		17.04		‐	>1	TATTTTTATGTTTAGGTGATTTTTGTGGGGATT
1		70402		70434		1_70434_‐		7.19913		‐	>2	ATTTTTTATGTTTAGAAACAAAATTTCCCCGAG
1		124497		124529		1_124529_‐		13.4856		‐	>3	ATTTTTTATATTTAAGTCTTGATTAACTGCTTT
1		159951		159983		1_159951_+		11.5248		+	>4	TTTATTTATATTTAGTGGGAGCAAAACAGTTTA
2		6541		6573		2_6573_‐		16.9789		‐	>5	AATTTTTATGTTTAGGTGATTTTAGTGGTAATT
2		93537		93569		2_93537_+		8.51814		+	>6	AGATATTATATTTATGTAAGAATTAAATTAATA
2		170191		170223		2_170223_‐		10.3217		‐	>7	CAGTTTTATATTTAGTGAACATATGGGCAATTC
2		255015		255047		2_255047_‐		13.2524		‐	>8	TTTATTTATTTTTATGTTTTGTATTTGGATTTT
2		407972		408004		2_408004_‐		9.93797		‐	>9	TTTATTTATATTTTGTTCTGGAAGCTCTTTACA
2		591418		591450		2_591418_+		15.8285		+	>10	ATAGTTTATGTTTAGCTATAAAATTTAACTTTT
2		704298		704330		2_704298_+		11.887		+	>11	TATATATATATTTAGGTAAATCATTTACACTTT
2		792022		792054		2_792054_‐		8.99777		‐	>12	TTTATTTTTATTTTTGTATTTTCAAAGGACATT
3		11254		11286		3_11254_+		13.8235		+	>13	TTTTTTTATGTTTTTTTAAAACATTAAAGTTTT
3		39560		39592		3_39592_‐		14.4454		‐	>14	TTTTTATATGTTTTGTTATGTATTGTTTATTTT
3		292648		292680		3_292680_‐		17.6194		‐	>15	ATTTTTTATATTTAGGTATTAAATTGCGATTTA
3		315811		315843		3_315811_+		16.1916		+	>16	TATTTTTATGTTTAGGTGATTTTAGTGGTGATT
4		86093		86125		4_86125_‐		9.82279		‐	>17	GATTTTTATGTTTGGGCGCAGAAAACAAGCTAA
4		212562		212594		4_212594_‐		11.7088		‐	>18	TTTTTTTATATTTTGTTGTTGGTTTCAGGAAAA
4		329671		329703		4_329671_+		12.4104		+	>19	GGTGTTTATATTTAGGTAGGGCATAAGGATTTA
4		427865		427897		4_427865_+		11.8123		+	>20	AAGTTTTATATTTAGGTGCTGCTTCCGGTACTT
4		462573		462605		4_462605_‐		13.4929		‐	>21	AGATTTTATGTTTAGATCTTTTATGCTTGCTTT
4		484003		484035		4_484035_‐		12.2431		‐	>22	TTTTTTTATATTTATGTAGCTTTTTGTATATTC
4		505485		505517		4_505517_‐		10.4526		‐	>23	TTTTTTTATATTTTTGCCTATATTCTTCTTTTT
4		555365		555397		4_555397_‐		9.48338		‐	>24	AAAGTTTATGTTTTTTCACTGGAGGCGTCATTT
4		913856		913888		4_913856_+		13.2807		+	>25	TATTTTTATATTTTGTTTCTTGCGTGGAGTTTT
4		1057887		1057919		4_1057887_+		13.9859		+	>26	ATTTTTTATGTTTATTCCATATATACACTTATA
4		1240919		1240951		4_1240919_+		11.0904		+	>27	TTGATTTATATTTAGTCCAAATATTACAGAAAA
4		1276277		1276309		4_1276277_+		8.901		+	>28	TTTTTTTATGTTTCCCCCCCAAAGTTCTGATTT
4		1302724		1302756		4_1302756_‐		9.91521		‐	>29	CAAATATATATTTAGTTAATGAAAATGGAATTA
4		1404322		1404354		4_1404322_+		9.09136		+	>30	TCTTTTTATATTTTGGAATGTTTTTGTGCTAAA
4		1447471		1447503		4_1447471_+		14.4494		+	>31	AAATTTTATGTTTAGTTAGGTTTTACCTTGAAT
4		1462047		1462079		4_1462047_+		11.547		+	>32	ATAATTTATGTTTAGCTCTTACTTTAATCCCAA
4		1502756		1502788		4_1502788_‐		13.6392		‐	>33	TATAATTATGTTTTTGTGAGAAATTTTAGCTTT
4		1524641		1524673		4_1524641_+		15.1604		+	>34	TATTTTTATGTTTAGGTGATTTTGGTGGTGATT
5		6406		6438		5_6438_‐		15.4549		‐	>35	TATTTTTATGTTTAGGTGATTTTGATGGTGATT
5		94055		94087		5_94055_+		10.3628		+	>36	CAAGTTTATATTTTGTTGCTAGCGTTACGGTTA
5		145682		145714		5_145714_‐		12.4964		‐	>37	CAGTTTTTTGTTTAGTTTTTTAATCTGGATATT
5		173776		173808		5_173808_‐		12.3658		‐	>38	TAATTTTATATTTTGCCTTGAAATTTAATCATG
5		212454		212486		5_212454_+		8.83164		+	>39	TAAAATTATGTTTAGGTAATGAAAAAATAGTAA
5		287565		287597		5_287565_+		13.9654		+	>40	TTTATTTATGTTTTGTTCCCAGCGGGCATCTTT
5		498884		498916		5_498884_+		13.1378		+	>41	CATATTTATGTTTAGTTTCCGAATGCTTTTGTA
5		569629		569661		5_569629_+		16.1916		+	>42	TATTTTTATGTTTAGGTGATTTTAGTGGTGATT
6		5463		5495		6_5495_‐		16.1916		‐	>43	TATTTTTATGTTTAGGTGATTTTAGTGGTGATT
6		118718		118750		6_118750_‐		6.54157		‐	>44	TGCTTTTATATTTTTTTAGATCATTTTCAAAAC
6		199401		199433		6_199401_+		11.8539		+	>45	CTTGTTTATATTTAGTTACGTTGGGATCAAGTT
6		256343		256375		6_256375_‐		13.3688		‐	>46	TTTTTTTATGTTTTTTCCGGAATTGGCTAAATT
7		485082		485114		7_485114_‐		14.3557		‐	>47	TTTATTTATGTTTTGCCGTAAGATCGATACTTT
7		574701		574733		7_574701_+		12.0302		+	>48	AGTATTTATGTTTTGTCATTCTTTTCTACATAA
7		659970		660002		7_660002_‐		13.9741		‐	>49	ATATTTTATGTTTACTTATGTTAACCTGCATTA
7		1083674		1083706		7_1083674_+		16.0858		+	>50	TATTTTTATGTTTAGGTGATTTTGATGATATTT
8		5437		5469		8_5469_‐		16.1916		‐	>51	TATTTTTATGTTTAGGTGATTTTAGTGGTGATT
8		7723		7755		8_7755_‐		16.0466		‐	>52	TATTTTTATATTTAGGTGATTTTAGTGGTTATT
8		116382		116414		8_116414_‐		8.42479		‐	>53	AAATAGTATGTTTTGGTGTTAAAGAAGAACATT
8		447761		447793		8_447793_‐		15.0713		‐	>54	TATGTTTATGTTTTGTGAGTAAAGTCAAGAATT
9		136276		136308		9_136308_‐		7.666		‐	>55	AAGTTTTATCTTTGGTTGAAGCAGTTTATGTTT
9		175170		175202		9_175170_+		10.365		+	>56	ATGTTTTATGTTTTGTCTGGAAAAACATATAGT
9		214732		214764		9_214732_+		9.92163		+	>57	TTAATTTATGTTTTGTAAAGAATAAAATGAGTA
9		357222		357254		9_357222_+		8.60296		+	>58	AATTTTTATATTTTGTTGCTTCAAAAACAGTGC
9		439100		439132		9_439100_+		17.3807		+	>59	TATTTTTATGTTTAGGTGATTTTAGTGGTAATT
10		67663		67695		10_67663_+		7.70191		+	>60	AAATTATATGTTTTTGTCCTGGGCGCGACATTC
10		99585		99617		10_99617_‐		12.9205		‐	>61	TTTATTTATGTTTTGTTTAACTGACGGTGTTTT
10		113712		113744		10_113744_‐		10.822		‐	>62	TAAATATATATTTAGTTATGGAAATTCAATAAA
10		228543		228575		10_228575_‐		11.2455		‐	>63	AATATTTATATTTATGTACAGTTTTACATTGTA
10		337048		337080		10_337048_+		13.1864		+	>64	TTTTTTTATGTTTAGCTAAGTAAAAGCAGCTTG
10		417058		417090		10_417090_‐		13.5021		‐	>65	ATTTTTTATATTTAGTTTACTTTCCAGTCAATT
10		442392		442424		10_442424_‐		13.5194		‐	>66	TAAATTTATATTTTGTTCGTAAAAAGAAAAATT
10		612741		612773		10_612773_‐		14.6221		‐	>67	TTTTTTTATCTTTAGTTGCCTAAATACTATTTA
11		741		773		11_773_‐		16.2472		‐	>68	TATTTTTATGTTTAGGTAATTTTAGTGGTGATT
11		98385		98417		11_98385_+		11.7706		+	>69	TTTTTTTATGTTTAGTGTATATTTGCTAGAAAG
11		325956		325988		11_325988_‐		8.92001		‐	>70	GAATATTATTTTTATTTATTTATTTATATTATT
11		329468		329500		11_329500_‐		14.6252		‐	>71	TTTTTTTATGTTTTTTTACGTTTTGAGATCATA
11		388662		388694		11_388662_+		14.9652		+	>72	CTTGTTTATGTTTATTTGTAAAATTACATTATT
11		447805		447837		11_447837_‐		12.8834		‐	>73	CCTTTTTATGTTTTGTTCTTGATTTTAATACTA
11		612014		612046		11_612046_‐		9.9857		‐	>74	TTTTTTTATGTTTTTGGCTCCTAGAGGTGAATA
11		642412		642444		11_642412_+		13.5507		+	>75	TGATTTTATATTTAGTTGGCGAACTAGCTCATC
11		665568		665600		11_665568_+		15.1604		+	>76	TATTTTTATGTTTAGGTGATTTTGGTGGTGATT
12		5918		5950		12_5918_+		14.6469		+	>77	TTATTTTATGTTTACTTTTTATAGATTGTCTTT
12		373297		373329		12_373329_‐		12.1529		‐	>78	TTTTTTTATATTTTCTCCGTATTTATGAAAATT
12		412822		412854		12_412854_‐		13.7762		‐	>79	ATGTTTTTTGTTTTGTTGTAGTATTCGAGCATT
12		450506		450538		12_450506_+		12.4963		+	>80	CGTTTTTATGTTTATTCGCTAAAACCCTTCTTA
12		460369		460401		12_460401_‐		7.09017		‐	>81	TTTTTTTTTTTTTTTTTAAGTAAATGGCAGTTT
12		513054		513086		12_513086_‐		12.7984		‐	>82	TTTATTTATGTTTTTGTCACAAACGCGCACATG
12		659892		659924		12_659892_+		13.7201		+	>83	GCTTTTTATGTTTATTTCATGGATTACGAAATT
12		822089		822121		12_822089_+		11.0262		+	>84	TATTTTTATGTTTAAGAAAGGATTAAGAACAAT
12		888709		888741		12_888741_‐		14.1212		‐	>85	GTTTTTTATGTTTAGATGTAAAAATTAATTTTT
12		1064312		1064344		12_1064312_+		16.1916		+	>86	TATTTTTATGTTTAGGTGATTTTAGTGGTGATT
13		137321		137353		13_137321_+		12.4515		+	>87	AATATTTATGTTTTGTTAATCTCCTCTACCCTT
13		159046		159078		13_159046_+		12.9155		+	>88	TGTTTTTATGTTTAGACCTCGTACATAGGAATA
13		263126		263158		13_263126_+		7.70008		+	>89	ATTTTTTATATTTTGTGATAAAGGGATAACTCG
13		286914		286946		13_286946_‐		10.1486		‐	>90	AGGATTTATGTTTTTTTGTTGCTTTGGAACTTT
13		535738		535770		13_535770_‐		15.4832		‐	>91	TTAATTTATATTTAGTTTAGGATATAGATTATC
13		611317		611349		13_611317_+		13.7591		+	>92	ATTGTTTATGTTTATGTTCTTTATACTCAAAAT
13		688902		688934		13_688902_+		5.3524		+	>93	TAATTTTTTTTTTTGATGTTCGACATCATTATT
13		758385		758417		13_758417_‐		10.0205		‐	>94	AAATTTTATGTTTTTTTCTTCGTTTTGCGAAAA
13		805162		805194		13_805162_+		12.8451		+	>95	TATTTTTGTATTTAGTCTTTGTTTTCGAACTTT
13		815391		815423		13_815391_+		11.4708		+	>96	AAATTCTATGTTTTGTTCCTGAAATCTCGATAT
13		897945		897977		13_897977_‐		12.2572		‐	>97	TTTTTTTATGTTTGGTTCTTGTTATTGAACAAA
14		250461		250493		14_250493_‐		8.32188		‐	>98	ACAATTTGTATTTAGTTGGTGTGACCTCAAATT
14		412407		412439		14_412439_‐		7.02431		‐	>99	TTTTTTTATATTTCTGCCCAAAAAACGTAGTTC
14		499037		499069		14_499037_+		10.6476		+	>100	TTTCTTTATGTTTAGCTCTTTTTTCATCACTTC
14		500650		500682		14_500682_‐		4.70867		‐	>101	TATTTTTATGTTTTCATTTCGAAACTTGCTGGT
14		738714		738746		14_738714_+		12.5092		+	>102	CGCATTTATATTTAGTTAACATTATGTGAAATT
14		764321		764353		14_764353_‐		9.03008		‐	>103	ACATTTTTTATTTTGTTTCATCTTTGTGATTTT
15		780		812		15_812_‐		16.1916		‐	>104	TATTTTTATGTTTAGGTGATTTTAGTGGTGATT
15		10926		10958		15_10926_+		11.0754		+	>105	TAATTATATGTTTAGGTGATTGCTTAGGTTTGT
15		85328		85360		15_85360_‐		11.2805		‐	>106	TATATTTATGTTTATGTTCCATCATGTAGAAAA
15		167002		167034		15_167002_+		12.3119		+	>107	TTTATTTATGTTTTCGTTATATTTTCAACATTT
15		277701		277733		15_277733_‐		12.3309		‐	>108	GTTGTTTATCTTTTGTTATTAAAGCTCTACTTT
15		309233		309265		15_309265_‐		8.2573		‐	>109	GAAAATTATATTTTGTCATGAAGTAATCTATTC
15		908306		908338		15_908306_+		14.1055		+	>110	TTTGTTTATGTTTAGGTTAACGATAGACATATT
16		43131		43163		16_43163_‐		14.6897		‐	>111	TATTTTTATGTTTTTGTTTATATTTTTGAATTT
16		74102		74134		16_74134_‐		8.05888		‐	>112	TATCTTTTTTTTTTGTTACTATTAGTCATGTTT
16		116593		116625		16_116593_+		12.83		+	>113	TATTTTTATGTTTTGTTCCATACTAAATGCAGT
16		384592		384624		16_384592_+		13.3105		+	>114	AAAATTTATGTTTATGTGGCGTAAAATATCTTT
16		511704		511736		16_511704_+		13.2688		+	>115	TATTTTTATGTTTTTTGAGATATTTCGAGCTTT
16		563877		563909		16_563877_+		9.6204		+	>116	GTCTTTTATATTTAGTCCGCTTTACACCGAAAA
16		695465		695497		16_695465_+		14.692		+	>117	AATTTTTATATTTGGTTCGAAAATTATGACATT
16		777063		777095		16_777095_‐		12.5663		‐	>118	TTTATTTATATTTTGGCATTACTCTTCATCATT
16		819308		819340		16_819340_‐		14.6098		‐	>119	AATTTTTATATTTATTCATGATATATTAATATT
16		880905		880937		16_880905_+		14.8631		+	>120	ATATTTTATGTTTAGGTTAATAACTTTGGTAAT
16		942425		942457		16_942425_+		14.7587		+	>121	AATTTTTATGTTTAGGTGATTTTGGTGGTGATT

## Sheet: Fig. 2E
MCM2-7	ORC G1	ORC G2
23	10	5
70	25	22
2	42	23
14	14	9
25	6	-1
25	23	6
27	0	9
54	-11	3
25	16	-63
41	42	8
-23	10	7
44	-17	41
21	3	0
-49	-30	18
35	16	-15
-46	16	11
-19	-5	30
6	11	19
55	11	11
18	19	20
-40	21	7
25	-43	0
24	25	8
31	28	6
33	4	5
23	-55	31
51	18	19
-36	26	30
24	43	-6
10	45	7
15	36	9
-48	4	29
42	20	14
26	4	17
24	12	24
14	30	6
-25	27	1
46	23	-2
35	4	9
12	-8	3
26	29	27
40	7	9
28	23	16
12	24	3
27	12	22
11	22	11
-79	17	6
6	17	16
-24	22	14
-43	19	26
14	14	13
-40	27	29
-5	28	18
12	24	-1
-51	-2	6
-80	16	1
10	18	7
32	2	-13
41	28	23
41	44	-49
30	26	5
30	19	-20
24	33	-7
27	20	9
11	25	-21
-10	23	-4
28	35	15
35	22	11
36	23	23
27	32	25
23	17	27
29	14	9
18	1	24
38	74	7
77	22	16
34	18	39
13	18	18
49	18	19
35	2	14
32	28	8
62	7	8
44	23	26
53	25	14
39	6	15
36	29	20
30	24	25
-16	30	21
21	24	23
29	19	24
-15	15	4
22	28	20
52	-1	17
38	24	27
28	26	8
26	21	18
27	41	-15
36	20	8
49	17	27
27	2	9
38	21	20
-18	22	7
27	22	28
19	52	27
34	12	19
23	36	22
51	23	9
-8	32	9
17	21	26
2	7	9
21	26	26
22	30	9
22	20	19
52	-23	17
12	11	25
36	17	-26
23	34	-17
32	28	21
21	28	8
7	19	-12
26	13	26
30	18	10
20	20	21
-23	42	9
11	24	16
17	39	10
34	26	29
28	17	24
28	33	27
19	33	13
13	-22	-29
18	31	28
20	19	10
42	9	24
24	22	35
39	-2	-26
26	28	26
17	7	18
33	3	15
33	17	10
-22	27	26
31	41	-14
19	27	6
-7	17	-17
22	28	17
-2	9	25
28	26	25
7	32	9
3	14	23
17	9	18
27	31	9
41	20	8
27	31	41
17	21	-1
28	11	-21
-4	13	25
71	10	19
-49	28	8
-34	33	11
32	9	16
34	14	32
29	26	20
-6	14	16
120	10	0
-37	31	-7
-33	15	26
31	24	9
28	27	24
-54	45	19
17	33	22
55	23	-22
-4	23	5
11	24	55
-18	19	-37
22	-31	-7
23	28	11
-16	19	0
23	38	28
39	36	0
32	14	27
25	18	23
-60	24	8
25	11	32
26	18	-2
28	26	24
58	4	28
-22	11	21
-41	42	11
-42	22	2
37	29	0
44	42	23
61	26	24
-7	15	20
25	18	20
23	19	9
88	32	3
24	10	0
44	16	8
32	20	29
38	38	7
28	33	1
16	24	2
5	21	9
48	19	9
-35	26	10
75	30	2
47	25	26
13	23	20
0	5	-2
9	23	13
-34	-18	6
26	30	0
26	19	-7
-34	30	26
3	25	10
-71	7	23
49	17	-2
38	21	-2
20	22	4
16	18	30
17	-31	7
23	14	14
7	20	-8
24	35	5
37	-4	31
105	-2	21
41	1	26
36	12	7
31	19	9
27	18	16
-26	29
31	10
-54	35
37	17
65	37
15	36
-1	55
56	6
39	39
26	28
70	-57
31	21
29	12
11	34
38	1
11	19
48	24
2	34
61	28
51	18
31	-6
47	29
-30	26
37	31
67	0
48	6
37	0
29	16
45	18
33	-17
-30	25
44	16
51	26
29	37
-61	15
24	14
31	3
51	24
32	3
21	-1
30	22
29	-1
17	24
14	4
36	39
-3	8
86	30
-28	18
20	9
-18	14
22	14
44	26
51	10
36	22
28	-6
54	1
48	6
27	3
23	24
14	0
23	13
7	50
-26	16
2	52
-25	33
49	9
-11	29
36	25
-10	0
39	8
4	7
38	28
29
6
12
-30
38
54
32
21
-17
79
30
26
24
6
-19
33
56
-30
45
45
42
1
14
31
13
-30
26
-5

## Sheet: Fig. 2G
overlap	no overlap
23	54
70	25
2	23
14	-79
25	-40
25	-80
27	52
25	-23
41	-49
-23	-34
44	120
21	-37
-49	-54
35	-60
-46	-41
-19	-71
6	105
55	-54
18	70
-40	67
24	-61
31
33
51
-36
24
10
15
-48
42
26
24
14
-25
46
35
12
26
40
28
12
27
11
6
-24
-43
14
-5
12
-51
10
32
41
41
30
30
24
27
11
-10
28
35
36
27
23
29
18
38
77
34
13
49
35
32
62
44
53
39
36
30
-16
21
29
-15
22
52
38
28
26
27
36
49
27
38
-18
27
19
34
23
51
-8
17
2
21
22
22
12
36
23
32
21
7
26
30
20
11
17
34
28
28
19
13
18
20
42
24
39
26
17
33
33
-22
31
19
-7
22
-2
28
7
3
17
27
41
27
17
28
-4
71
32
34
29
-6
-33
31
28
17
55
-4
11
-18
22
23
-16
23
39
32
25
25
26
28
58
-22
-42
37
44
61
-7
25
23
88
24
44
32
38
28
16
5
48
-35
75
47
13
0
9
-34
26
26
-34
3
49
38
20
16
17
23
7
24
37
41
36
31
27
-26
31
37
65
15
-1
56
39
26
31
29
11
38
11
48
2
61
51
31
47
-30
37
48
37
29
45
33
-30
44
51
29
24
31
51
32
21
30
29
17
14
36
-3
86
-28
20
-18
22
44
51
36
28
54
48
27
23
14
23
7
-26
2
-25
49
-11
36
-10
39
4
38

## Sheet: Fig. 3A
	ORC2					MCM4
	ARS607	ARS305	ARS1021			ARS607	ARS305	ARS1021
G2	0.107061	0.0198836	0.127034		G2	0.0151891	0.0069306	0.0108673
15 min	0.14667	0.0369269	0.19183		15 min	0.0152468	0.00664051	0.0138471
30 min	0.0421067	0.0246417	0.0823695		30 min	0.166952	0.0519337	0.110327
45 min	0.0170518	0.00882746	0.031418		45 min	0.369129	0.0622185	0.14803
	ARS607	ARS305	ARS1021			ARS607	ARS305	ARS1021
G2	0.145628	0.0738772	0.326807		G2	0.00698013	0.00384633	0.00708113
15 min	0.133626	0.0965168	0.321446		15 min	0.00678168	0.00501612	0.00685343
30 min	0.0844229	0.0461685	0.162427		30 min	0.231756	0.087769	0.161402
45 min	0.0217344	0.0184606	0.0411005		45 min	0.266194	0.127859	0.149676
	ARS607	ARS305	ARS1021			ARS607	ARS305	ARS1021
G2	0.232869	0.0823631	0.390306		G2	0.00547208	0.00392928	0.00749807
15 min	0.0865312	0.0252335	0.221567		15 min	0.00705521	0.00411935	0.00384926
30 min	0.0322775	0.0187015	0.174436		30 min	0.107093	0.0334874	0.0645381
45 min	0.0100008	0.00484107	0.0364425		45 min	0.306492	0.112227	0.158398
Average					Average
G2	0.161852	0.058708	0.281382		G2	0.00921377	0.00490207	0.00848217
15 min	0.122276	0.0528924	0.244947		15 min	0.00969456	0.00525866	0.00818326
30 min	0.0529357	0.0298372	0.139744		30 min	0.1686	0.0577301	0.112089
45 min	0.0162623	0.0107097	0.0363203		45 min	0.313938	0.100768	0.152035
SD					SD
G2	0.0644542	0.0338895	0.137389		G2	0.00522942	0.00175724	0.00207609
15 min	0.0316354	0.0382296	0.0678977		15 min	0.00481032	0.00127796	0.00512986
30 min	0.0277081	0.0144518	0.0500493		30 min	0.0623482	0.0276011	0.0484559
45 min	0.00590652	0.00700212	0.00484245		45 min	0.0518701	0.0342877	0.00557163

## Sheet: Fig.3B
	ARS607	ARS305	ARS1021
rep	wt	G2/M
1	29.9359	28.1572	40.8318
2	62.0619	29.5157	79.4994
3	61.5928	34.6445	75.2786
rep	cdc6-1	G2/M
1	44.6086	24.126	58.3013
2	64.3398	31.7758	81.0738
3	45.6869	27.664	59.0156
rep	wt	G1
1	2.33564	2.37858	1.99059
2	11.1478	4.5973	14.1421
3	11.7592	4.44563	14.3835
rep	cdc6-1	G1
1	23.6329	18.629	29.0177
2	36.1232	14.4978	42.9389
3	29.9474	13.1492	36.7592
Averages
ARS607	ARS305	ARS1021
51.1969	30.7724	65.2033	wt	G2/M
51.5451	27.8553	66.1302	cdc6-1
8.41423	3.80717	10.1721	wt	G1
29.9012	15.4253	36.2386	cdc6-1
Standard deviation
18.414	3.4214	21.2115	wt	G2/M
11.0937	3.82848	12.9464	cdc6-1
5.27308	1.23952	7.0864	wt	G1
6.24529	2.85521	6.97521	cdc6-1

## Sheet: Fig. 3C
	ARS607	ARS305	ARS1021
rep	wt	G2/M
1	29.9359	28.1572	40.8318
2	62.0619	29.5157	79.4994
3	61.5928	34.6445	75.2786
rep	cdc46-1	G2/M
1	43.4491	21.3288	55.3843
2	64.5096	33.5455	80.8379
3	34.6193	20.9874	48.2795
rep	wt	G2/M
1	2.33564	2.37858	1.99059
2	11.1478	4.5973	14.1421
3	11.7592	4.44563	14.3835
rep	cdc46-1	G2/M
1	49.1502	10.8421	57.9224
2	43.4653	30.6566	48.1079
3	81.8814	20.6228	88.0794
Averages
ARS607	ARS305	ARS1021
51.1969	30.7724	65.2033	wt	G2/M
47.526	25.2872	61.5006	cdc46-1
8.41423	3.80717	10.1721	wt	G1
58.1656	20.7072	64.7032	cdc46-1
Standard deviation
18.414	3.4214	21.2115	wt	G2/M
15.3566	7.15388	17.1193	cdc46-1
5.27308	1.23952	7.0864	wt	G1
20.7342	9.90752	20.8306	cdc46-1

## Sheet: Fig. 3D
wt_G2	wt_G1	cdc6-1_G2	cdc6-1_G1	cdc46-1_G2	cdc46-1_G1
14781	7033	20003	22685	16099	22372
11224	1871	15640	12697	13553	16269
6261	762	10318	6177	7801	7448
6401	854	10184	6137	7877	7473
11734	4110	15680	17317	13348	18605
6313	2245	9113	11398	8085	13239
3416	1979	5116	8675	3877	8847
5190	1147	8366	6063	5416	7105
11216	2777	13728	12206	11730	18505
7422	1782	11226	11518	9999	14289
5582	2228	8251	11776	6906	12668
3744	2418	5580	7410	4496	6758
8381	3746	10515	12973	9790	14467
7499	2694	10582	13286	8174	13620
3324	1106	5682	6745	4940	9312
7689	3432	11237	13469	9758	16131
12030	287	19788	34012	15859	27724
5356	586	7908	5776	6085	6199
7589	4467	10580	13229	8719	12972
5998	2071	8823	8366	7983	11587
8738	6139	9768	15492	9729	17176
5336	3475	10167	12615	7462	11356
2184	1395	4297	7841	3623	8808
4986	2468	7577	8002	6586	9012
5153	636	8431	5401	6120	6037
5070	228	7998	3262	6200	3922
2218	1386	4175	7638	3566	8593
5885	1261	9157	6663	7086	9291
5708	2495	7413	9173	6657	10708
5986	897	9161	8662	7647	12610
5092	2486	7502	9726	6117	9991
5375	689	7427	4341	6116	5839
4164	2052	5567	8160	5067	10981
4874	648	7071	4879	6096	7009
4601	2464	6159	8427	4832	9650
7467	2945	10413	13404	9418	15550
4814	233	6367	2562	5455	4615
5213	2340	7885	10645	6995	12312
5833	1292	8113	8215	6740	8557
4802	155	6615	2177	5528	4456
3804	2779	6111	11673	4937	12733
6253	3417	8757	11067	7350	12416
4677	735	6394	4417	5245	5614
3294	1931	5416	7131	4208	7453
5585	3329	8443	11771	7197	12499
4684	2111	6618	8974	5872	9634
5403	1161	7143	6043	6290	7781
6145	4694	7804	11645	7423	13403
3723	2528	4662	6364	4568	8888
4602	1852	6250	7737	5593	9276
2311	2064	3217	5437	4486	10670
6588	4496	8569	11754	8540	13869
4226	2288	7189	11386	6142	12696
4752	1285	6537	6866	5627	8299
2027	590	3626	4990	3121	7228
5392	2469	7962	9914	6585	11351
1672	1905	2925	5661	2814	7507
5376	512	7130	3917	5901	6950
4355	469	5283	3073	5015	4977
2417	485	3802	4106	3346	6989
3865	526	5545	4246	4890	8499
1651	697	2456	3931	2357	6333
4645	1694	6666	9345	5613	12407
4541	2597	6278	3760	5227	5222
3110	1165	4870	5761	3997	8039
4592	736	6432	4599	5655	7916
1924	751	2791	3114	2182	3692
1748	686	1714	2152	1028	3028
2697	1247	4179	6809	3463	8830
4362	521	6968	4320	4934	4874
2335	1389	3379	4956	2996	6289
3818	1593	5280	6772	4343	7997
5476	4216	6588	9885	6508	11412
1925	1131	3139	4093	2460	4221
2686	1346	4573	5746	3681	7188
3687	522	5076	4076	4240	5801
2890	1174	3755	4203	3522	6898
2815	1407	4363	6489	3515	7275

[truncated: 47 more sheets: Fig. 3E, Fig. 4B, Fig. 4C, Fig. 4E, Fig. 4F, Fig. 5A, Fig. 5B, Fig. 5C, Fig. 5F, Fig. 5G, Fig. 5H, Fig. 6A, Fig. 6B, Fig. 6C, Fig. 6E, Fig. 6F, Fig. 6G, Supplementary Fig. 1, Supplementary Fig. 2A, Supplementary Fig. 2B …]
